# Supplementary material for: Metabolic Impact of Adult-Onset, Isolated, Growth Hormone Deficiency (AOiGHD) Due to Destruction of Pituitary Somatotropes
Source: PubMed Central journal article supplement (PMC3023710; doi:10.1371/journal.pone.0015767), 2011-01-19
Supplement: pone.0015767.s003.pdf [file pone.0015767.s003.pdf]

AOiGHD  
DT-treated, Cre+/-,DTR+/-

Control  
DT-treated, Cre-/-,DTR+/-

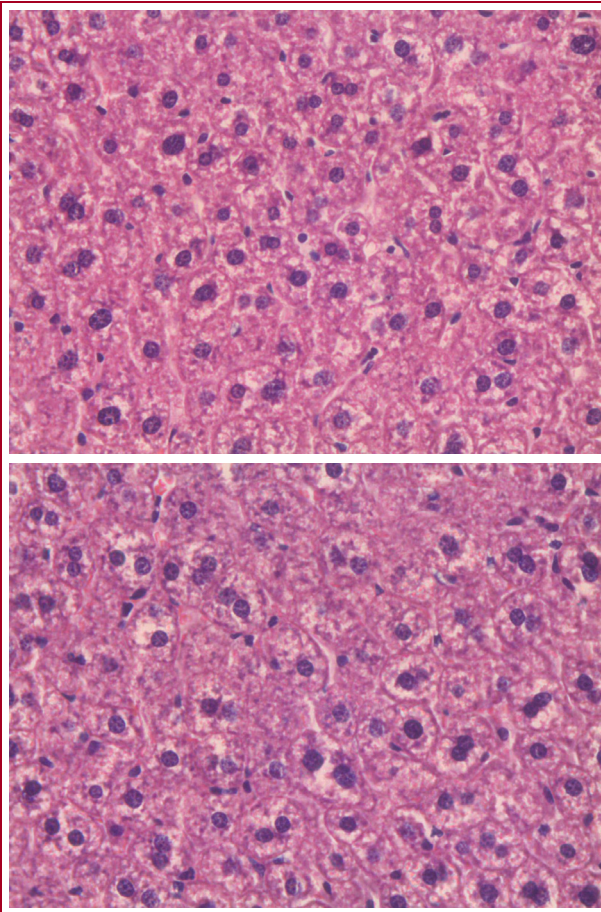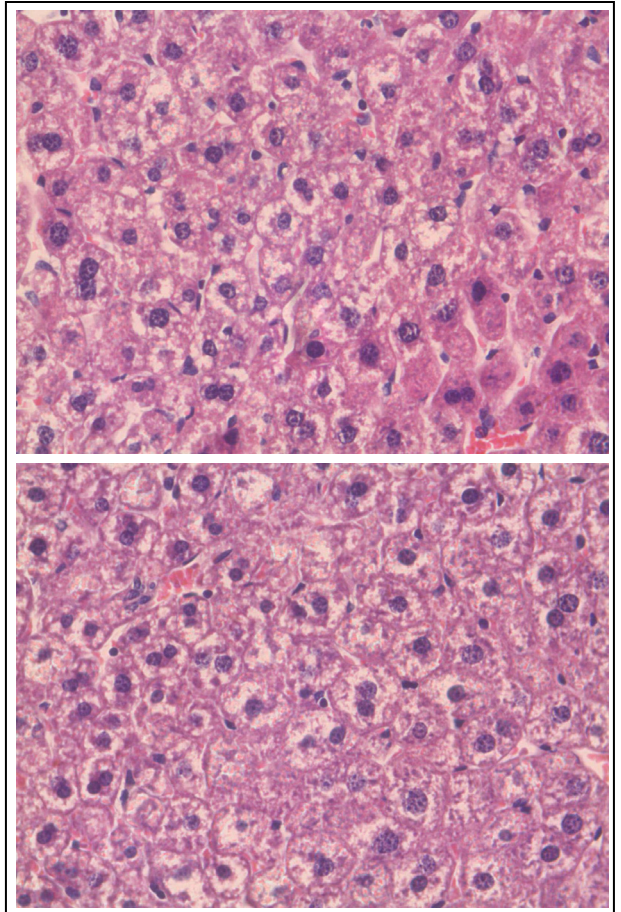

**Figure S3**

Hematoxylin:Eosin stained paraffin embedded liver sections from AOiGHD and GH-intact controls. Mice were fed a standard rodent chow diet (17% kcal from fat) and tissues collected at 10 months of age (7 months after DT treatment). Within AOiGHD hepatocytes there is less open (unstained) area, as compared to GH-intact controls, indicative of less lipid accumulation. This is consistent with reduced hepatic triglyceride levels in high-fat fed AOiGHD mice (shown in Fig. 3 in main body of the text).
