# Supplementary material for: Metabolic Impact of Adult-Onset, Isolated, Growth Hormone Deficiency (AOiGHD) Due to Destruction of Pituitary Somatotropes
Source: PubMed Central journal article supplement (PMC3023710; doi:10.1371/journal.pone.0015767), 2011-01-19
Supplement: pone.0015767.s004.pdf [file pone.0015767.s004.pdf]

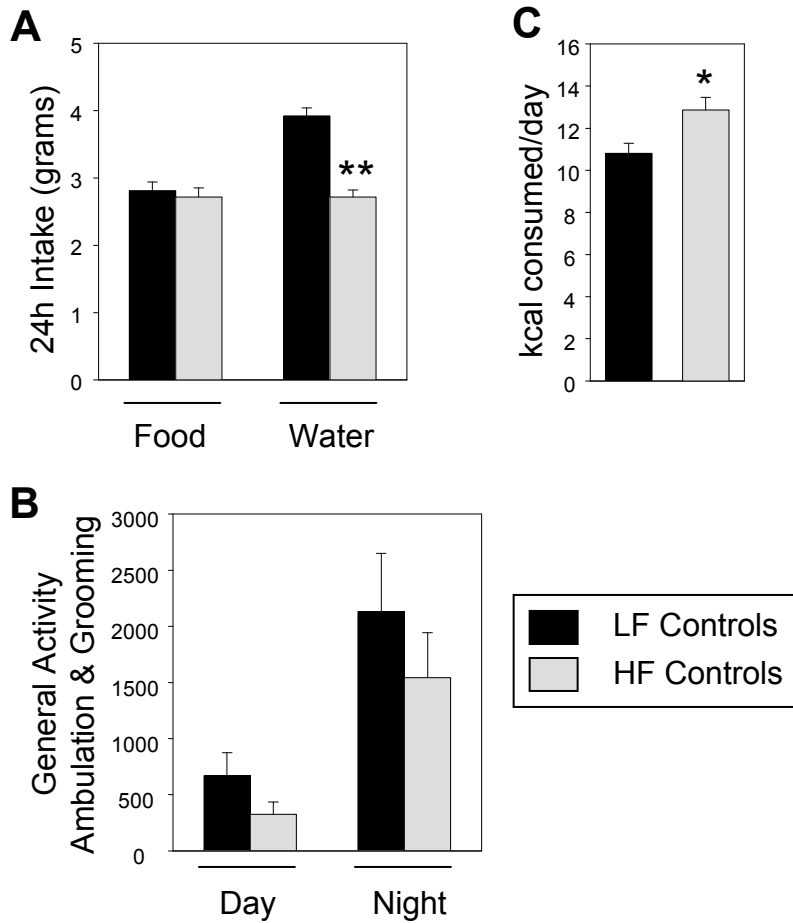

**Figure S4**

Comparison of food and water intake (A), kcal consumed (B) and activity levels of control mice (GH-intact) fed either a low fat (LF) or high fat (HF) diet. \*,  $p < 0.05$  and \*\*  $p < 0.01$ .
