# Supplementary material for: Metabolic Impact of Adult-Onset, Isolated, Growth Hormone Deficiency (AOiGHD) Due to Destruction of Pituitary Somatotropes
Source: PubMed Central journal article supplement (PMC3023710; doi:10.1371/journal.pone.0015767), 2011-01-19
Supplement: pone.0015767.s005.pdf [file pone.0015767.s005.pdf]

**Table S1. Fertility endpoints in AOiGHD mice, compared to wildtype (WT) mice in a C57Bl/6J background.**

| Breeding Pairs |               | # of Pairs Tested | Days to Conception | Pups / Litter |
|----------------|---------------|-------------------|--------------------|---------------|
| Female         | Male          |                   |                    |               |
| AOiGHD*        | WT            | 5                 | 4.4 ± 0.8          | 8.2 ± 0.7     |
| WT             | AOiGHD        | 5                 | 6.2 ± 2.7          | 7.4 ± 0.3     |
| WT†            | WT (in house) | 10                | 4.7 ± 1.1          | 7.0 ± 0.4     |
| WT (Jackson)   | WT (Jackson)  |                   |                    | 3-7           |

\*All 5 female AOiGHD mice successfully cared for their litters until weaning (d21)

† Similar data was obtained from C57Bl/6J females housed at the University of Cordoba, Spain (days to conception 6.1±2.4; pups/litter 5.1±0.4 - Raul M. Luque and Jose Cordoba, unpublished data).

Jackson Laboratories report C57Bl/6J mice are “good” breeders with 3-7 pups/litter  
<http://jaxmice.jax.org/strain/000664.html>
