# Supplementary material for: Metabolic Impact of Adult-Onset, Isolated, Growth Hormone Deficiency (AOiGHD) Due to Destruction of Pituitary Somatotropes
Source: PubMed Central journal article supplement (PMC3023710; doi:10.1371/journal.pone.0015767), 2011-01-19
Supplement: pone.0015767.s006.pdf [file pone.0015767.s006.pdf]

**Table S2 - Impact of AOiGHD and Diet on Circulating Metabolites**

|                     |      | LF          |             | HF          |             |
|---------------------|------|-------------|-------------|-------------|-------------|
|                     |      | Control     | AOiGHD      | Control     | AOiGHD      |
| Glucose (mg/dl)     | Fed  | 145 ± 5     | 149 ± 5     | 170 ± 6*    | 182 ± 6*    |
|                     | Fast | 139 ± 7     | 136 ± 6     | 163 ± 9*    | 155 ± 7*    |
| NEFA (mEq/L)        | Fed  | 0.42 ± 0.03 | 0.40 ± 0.02 | 0.45 ± 0.02 | 0.44 ± 0.02 |
|                     | Fast | 0.64 ± 0.06 | 0.58 ± 0.05 | 0.67 ± 0.03 | 0.61 ± 0.03 |
| TG (mg/dl)          | Fed  | 34 ± 3      | 33 ± 2      | 33 ± 3      | 36 ± 2      |
|                     | Fast | 29 ± 2      | 26 ± 1      | 22 ± 3      | 23 ± 2      |
| Cholesterol (mg/dl) | Fed  | 120 ± 3     | 115 ± 4     | 171 ± 9*    | 169 ± 5*    |
|                     | Fast | 115 ± 6     | 112 ± 4     | 155 ± 9*    | 151 ± 6*    |

Fed and fasted samples were taken at t0 of ITT and GTT, respectively, where GTT was performed 3 weeks after ITT, on control and AOiGHD mice fed a low-fat (LF) or high-fat (HF) diet. Given the age differences between fed and fasted sampling, the impact of GH-status and diet were made within feeding status (*ie* fed or fasted), using 2-way ANOVA, followed by Newman's Keul's test for pos-hoc comparisons. GH-status, within diet, did not alter the endpoints measured, however, high fat feeding increased circulating glucose and cholesterol levels as compared to LF-fed controls, independent of GH-status, under both fed and fasted conditions (\*, p<0.05).
