# Supplementary material for: Metabolic Impact of Adult-Onset, Isolated, Growth Hormone Deficiency (AOiGHD) Due to Destruction of Pituitary Somatotropes
Source: PubMed Central journal article supplement (PMC3023710; doi:10.1371/journal.pone.0015767), 2011-01-19
Supplement: pone.0015767.s007.pdf [file pone.0015767.s007.pdf]

Table S3 - PCR primer sets, positions relative Genbank sequence provided and products sizes

|                      | <u>Genbank<br/>Accession #</u> | <u>Primer<br/>Sequence</u>                                                     | <u>Nucleotide<br/>Position</u>   | <u>Product<br/>Size</u> |
|----------------------|--------------------------------|--------------------------------------------------------------------------------|----------------------------------|-------------------------|
| CRE                  | X03453.1                       | <b>Sense:</b> CGTACTGACGGTGGGAGAAT<br><b>Antisense:</b> CCCGGCAAAACAGGTAGTTA   | <b>Sn</b> 1043<br><b>As</b> 1208 | 166                     |
| DTR                  | M93012.1                       | <b>Sense:</b> CATCCACGGAGAATGCAAA<br><b>Antisense:</b> ACCACAGCCAGGATAGTTGTATG | <b>Sn</b> 406<br><b>As</b> 555   | 150                     |
| GHRH-R               | NM_001003685.1                 | <b>Sense:</b> ACCCGTATCCTCTGCTTGCT<br><b>Antisense:</b> AGGTGTTGTTGGTCCCCTCT   | <b>Sn</b> 45<br><b>As</b> 177    | 133                     |
| GHS-R                | NM_177330.3                    | <b>Sense:</b> TCAGGGACCAGAACCACAAA<br><b>Antisense:</b> CCAGCAGAGGATGAAAGCAA   | <b>Sn</b> 1002<br><b>As</b> 1072 | 71                      |
| GHRH                 | NM_010285.2                    | <b>Sense:</b> TGCCATCTTCACCACCAAC<br><b>Antisense:</b> TCATCTGCTTGCCTCTGTCC    | <b>Sn</b> 203<br><b>As</b> 360   | 158                     |
| GH                   | NM_008117.2                    | <b>Sense:</b> CCTCAGCAGGATTTTCACCA<br><b>Antisense:</b> CTTGAGGATCTGCCAACAC    | <b>Sn</b> 412<br><b>As</b> 553   | 142                     |
| PRL                  | NM_011164.1                    | <b>Sense:</b> GGCCATCTTGGAGAAGTGTG<br><b>Antisense:</b> ACAGATTGGCAGAGGCTGAA   | <b>Sn</b> 14<br><b>As</b> 153    | 140                     |
| TSH $\beta$ -subunit | NM_009432.1                    | <b>Sense:</b> CTCCGTGCTTTTTGCTCTTG<br><b>Antisense:</b> TTGCCATTGATATCCCGTGT   | <b>Sn</b> 177<br><b>As</b> 332   | 156                     |
| LH $\beta$ -subunit  | NM_008497.2                    | <b>Sense:</b> TGTCTAGCATGGTCCGAGT<br><b>Antisense:</b> AGGAAAGGAGACTATGGGGTCTA | <b>Sn</b> 179<br><b>As</b> 316   | 138                     |
| FSH $\beta$ -subunit | NM_008045.2                    | <b>Sense:</b> AGTTGATCCAGCTTTGCATCTT<br><b>Antisense:</b> GCCAGGCAATCTTACGGTCT | <b>Sn</b> 70<br><b>As</b> 314    | 245                     |
| $\alpha$ -subunit    | NM_009889.2                    | <b>Sense:</b> CTAGGAGCCCCATCTACCA<br><b>Antisense:</b> CACTCTGGCATTCCCATTAC    | <b>Sn</b> 242<br><b>As</b> 409   | 168                     |
| POMC                 | NM_008895.3                    | <b>Sense:</b> GAGGCCTTTCCCCTAGAGTT<br><b>Antisense:</b> CACCGTAACGCTTGCCTT     | <b>Sn</b> 615<br><b>As</b> 768   | 154                     |
| IGF-I                | NM_010512.3                    | <b>Sense:</b> TCGTCTTCACACCTTCTACCT<br><b>Antisense:</b> ACTCATCCACAATGCCTGTCT | <b>Sn</b> 31<br><b>As</b> 232    | 202                     |
| INS-2                | NM_008387.3                    | <b>Sense:</b> TCAAAAACCATCAGCAAGCA<br><b>Antisense:</b> ACCAGGTGGGAACCACAAA    | <b>Sn</b> 23<br><b>As</b> 180    | 158                     |
| Cyclophilin A        | NM_008907.1                    | <b>Sense:</b> TGGTCTTTGGGAAGGTGAAAG<br><b>Antisense:</b> TGTCCACAGTCGAAATGGT   | <b>Sn</b> 421<br><b>As</b> 529   | 109                     |
| GAPDH                | XM_001473623.1                 | <b>Sense:</b> ATGGCCTTCCGTGTTCTAC<br><b>Antisense:</b> GCCTGCTTACCACCTTCTT     | <b>Sn</b> 757<br><b>As</b> 860   | 104                     |
| $\beta$ -Actin       | NM_007393.2                    | <b>Sense:</b> CTGGGACGACATGGAGAAGA<br><b>Antisense:</b> ACCAGAGGCATACAGGACA    | <b>Sn</b> 313<br><b>As</b> 517   | 205                     |
